# Supplementary material for: Mutational analysis of epidermal and hyperproliferative type I keratins in mild and moderate psoriasis vulgaris patients: a possible role in the pathogenesis of psoriasis along with disease severity
Source: PubMed Central journal article supplement (PMC5963134; doi:10.1186/s40246-018-0158-2), 2018-05-21
Supplement: 40246_2018_158_MOESM1_ESM.pdf [file 40246_2018_158_MOESM1_ESM.pdf]

**Figure S1:** Comparison of the identified epidermal type I keratin nucleotide sequence of mild psoriasis obtained in this study with those of respective NCBI CDS sequences. The mutated sequences are indicated by arrow.

|                             |      |                                                                                                                                                                                                           |      |
|-----------------------------|------|-----------------------------------------------------------------------------------------------------------------------------------------------------------------------------------------------------------|------|
| <b>KRT14</b>                | 1    | A T G A C C A C C T G C A G C C G C C A G T T C A C C T C C T C C A G C T C C A T G A A G G G C T C C T G C G G C A T C G G G G G C G G C A T C G G G G G C G G C T C C A G C C G C A T C T C C T C C G   | 100  |
| <b>Mild Psoriatic KRT14</b> | 1    | A T G A C C A C C T G C A G C C G C C A G T T C A C C T C C T C C A G C T C C A T G A A G G G C T C C T G C G G C A T C G G G G G C G G C A T C G G G G G C G G C T C C A G C C G C A T C T C C T C C G   | 100  |
| <b>KRT14</b>                | 101  | T C C T G G C C G G A G G G T C C T G C C G C G C C C C A G C A C C T A C G G G G G C G G C C T G T C T G T C T C A T C C T C C C G C T T C T C C T C T G G G G G A G C C T A C G G G C T G G G G G G     | 200  |
| <b>Mild Psoriatic KRT14</b> | 101  | T C C T G G C C G G A G G G T C C T G C C G C G C C C C A G C A C C T A C G G G G G C G G C C T G T C T G T C T C A T C C T C C C G C T T C T C C T C T G G G G G A G C C T A C G G G C T G G G G G G     | 200  |
| <b>KRT14</b>                | 201  | C G G C T A T G G C G G T G G C T T C A G C A G C A G C A G C A G C A G C T T T G G T A G T G G C T T T G G G G G A G G A T A T G G T G G T G G C C T T G G T G C T G G C T T G G G T G G T G G C T T T   | 300  |
| <b>Mild Psoriatic KRT14</b> | 201  | C G G C T A T G G C G G T G G C T T C A G C A G C A G C A G C A G C A G C T T T G G T A G T G G C T T T G G G G G A G G A T A T G G T G G T G G C C T T G G T G C T G G C T T G G G T G G T G G C T T T   | 300  |
| <b>KRT14</b>                | 301  | G G T G G T G G C T T T G C T G G T G G T G A T G G G C T T C T G G T G G G C A G T G A G A A G G T G A C C A T G C A G A A C C T C A A T G A C C G C C T G G C C T C C T A C C T G G A C A A G G T G C   | 400  |
| <b>Mild Psoriatic KRT14</b> | 301  | G G T G G T G G C T T T G C T G G T G G T G A T G G G C T T C T G G T G G G C A G T G A G A A G G T G A C C A T G C A G A A C C T C A A T G A A C G C C T G G C C T C C T A C C T G G A C A A G G T G C   | 400  |
| <b>KRT14</b>                | 401  | G T G C T C T G G A G G A G G C C A A C G C C G A C C T G G A A G T G A A G A T C C G T G A C T G G T A C C A G A G G C A G C G G C C T G C T G A G A T C A A A G A C T A C A G T C C C T A C T T C A A   | 500  |
| <b>Mild Psoriatic KRT14</b> | 401  | G T G C T C T G G A G G A C G C C A A C G C C G A C C T G G A A G T G A A G A T C C G T G A C T G G T A C C A G A G G C A G C G G C T T G C T G A G A T C A T A G A C T A C A G T C C C T A C T T C A A   | 500  |
| <b>KRT14</b>                | 501  | G A C C A T T G A G G A C C T G A G G A A C A A G A T T C T C A C A G C C A C A G T G G A C A A T G C C A A T G T C C T T T C T G C A G A T T G A C A A T G C C C G T C T G G C C G C G G A T G A C T T C | 600  |
| <b>Mild Psoriatic KRT14</b> | 501  | G A C C A T T G A G G A C C T G A G G A A C A A G A T T C T C A C A G C C A C A G T G G A C A A T G C C A A T G T C C T T T C T G C A G A T T G A C A A T G C C C G T C T G G C C G C G G A T G A C T T C | 600  |
| <b>KRT14</b>                | 601  | C G C A C C A A G T A T G A G A C A G A G T T G A A C C T G C G C A T G A G T G T G G A A G C C G A C A T C A A T G G C C T G C G C A G G G T G C T G G A C G A A C T G A C C C T G G C C A G A G C T G   | 700  |
| <b>Mild Psoriatic KRT14</b> | 601  | C G C A C C A A G T A T G A G A C A G A G T T G A A C C T G C G C A T G A G T G T G G A A G C C G A C A T C A A T G T C C T G C G C A G G G T G C T G G A C G A A C T G A C C C T G G C C A G A G C T G   | 700  |
| <b>KRT14</b>                | 701  | A C C T G G A G A T G C A G A T T G A G A G C C T G A A G G A G G A G C T G G C C T A C C T G A A G A A G A A C C A C G A G G A G G A G A T G A A T G C C C T G A G A G G C C A G G T G G G T G G A G A   | 800  |
| <b>Mild Psoriatic KRT14</b> | 701  | A C C T G G A G A T G C A G A T T G A G A G C C T G A A G G A G G A G C T G G C C T A C C T G A A G A A G A A C C A C G A G G A G G A G A T G A A T G C C C T G A G A G G C C A G G T G G G T G G A G A   | 800  |
| <b>KRT14</b>                | 801  | T G T C A A T G T G G A G A T G G A C G C T G C A C C T G G C G T G G A C C T G A G C C G C A T T C T G A A C G A G A T G C G T G A C C A G T A T G A G A A G A T G G C A G A G A A G A A C C C A A G     | 900  |
| <b>Mild Psoriatic KRT14</b> | 801  | T G T C A A T G T G G A G A T G G A C G C T G C A C C T G G C G T G G A C C T G A G C C G C A T T C T G A A C G A G A T G C G T G A C C A G T A T G A G A A G A T G G C A G A G A A G A A C C C A A G     | 900  |
| <b>KRT14</b>                | 901  | G A T G C C G A G G A A T G G T T C T T C A C C A A G A C A G A G G A G C T G A A C C G C G A G G T G G C C A C C A A C A G C G A G C T G G T G C A G A G C G G C A A G A G C G A G A T C T C G G A G C   | 1000 |
| <b>Mild Psoriatic KRT14</b> | 901  | G A T G C C G A G G A A T G G T T C T T C A C C A A G A C A G A G G A G C T G A A C C C C G A G G T G G C C A C C A A C A G C G A G C T G G T G C A G A G C G G C A A G A G C G A G A T C T C G G A G C   | 1000 |
| <b>KRT14</b>                | 1001 | T C C G G C G C A C C A T G C A G A A C C T G G A G A T T G A G C T G C A G T C C C A G C T C A G C A T G A A A G C A T C C C T G G A G A A C A G C C T G G A G G A G A C C A A A G G T C G C T A C T G   | 1100 |
| <b>Mild Psoriatic KRT14</b> | 1001 | T C C G G C G C A C C A T G C A G A A C C T G G A G A T T G A G C T G C A G T C C C A G C T C A G C A T G A A A G C A T C C C T G G A G A A C A G C C T G G A G G A G A C C A A A G G T C G C T A C T G   | 1100 |
| <b>KRT14</b>                | 1101 | C A T G C A G C T G G C C C A G A T C C A G G A G A T G A T T G G C A G C G T G G A G G A G C A G C T G G C C C A G C T C C G C T G C G A G A T G G A G C A G C A G A A C C A G G A G T A C A A G A T C   | 1200 |
| <b>Mild Psoriatic KRT14</b> | 1101 | C A T G C A G C T G G C C C A G A T C C A G G A G A T G A T T G G C A G C G T G G A G G A G C A G C T G G C C C A G C T C C G C T G C G A G A T G G A G C A G C A G A A C C A G G A G T A C A A G A T C   | 1200 |
| <b>KRT14</b>                | 1201 | C T G C T G G A C G T G A A G A C G C G G C T G G A G C A G G A G A T C G C C A C C T A C C G C C G C C T G C T G G A G G G C G A G G A C G C C C A C C T C T C C T C C T C C C A G T T C T C C T C T G   | 1300 |
| <b>Mild Psoriatic KRT14</b> | 1201 | C T G C T G G A C G T G A A G A C G C G G C T G G A G C A G G A G A T C A C C A C C T A C T G C C G C C T G C T G G A G G G C G A G G A C G C C C A C C T C T C C T C C T C C C A G T T C T C C T C T G   | 1300 |
| <b>KRT14</b>                | 1301 | G A T C G C A G T C A T C C A G A G A T G T G A C C T C C T C C A G C C G C C A A A T C C G C A C C A A G G T C A T G G A T G T G C A C G A T G G C A A G G T G G T G T C C A C C C A C G A G C A G G T   | 1400 |
| <b>Mild Psoriatic KRT14</b> | 1301 | G A T C G C A G T C A T C C A G A G A T G T G A C C T C C T C C A G C C G C C A A A T C C G C A C C A A G G T C A T G G A T G T G C A C G A T G G C A A G G T G G T G T C C A C C C A C G A G C A G G T   | 1400 |
| <b>KRT14</b>                | 1401 | C C T T C G C A C C A A G A A C T G A                                                                                                                                                                     | 1419 |
| <b>Mild Psoriatic KRT14</b> | 1401 | C C T T C G C A C C A A G A A C T G A                                                                                                                                                                     | 1419 |



**Figure S1:** Comparison of the identified epidermal type I keratin nucleotide sequence of mild psoriasis obtained in this study with those of respective NCBI CDS sequences. The mutated sequences are indicated by arrow.

|                             |      |                                                                                                                                                                                                                                             |      |
|-----------------------------|------|---------------------------------------------------------------------------------------------------------------------------------------------------------------------------------------------------------------------------------------------|------|
| <b>KRT10</b>                | 1    | A T G T C T G T T C G A T A C A G C T C A A G C A A G C A C T A C T C T T C C T C C C G C A G T G G A G G A G G A G G A G G A G G A G G A T G T G G A G G A G G A G G A G G A G G A T G T G G A G G A G G A G G A G G A G T G T C A T C C C | 100  |
| <b>Mild Psoriatic KRT10</b> | 1    | A T G T C T G T T C G A T A C A G C T C A A G C A A G C A C T A C T C T T C C T C C C G C A G T G G A G G A G G A G G A G G A G G A G G A T G T G G A G G A G G A G G A G G A G T G T C A T C C C                                           | 100  |
| <b>KRT10</b>                | 101  | T A A G A A T T T C T A G C A G C A A A G G C T C C C T T G G T G G A G G A T T T A G C T C A G G G G G T T C A G T G G T G G C T C T T T T A G C C G T G G G A G C T C T G G T G G G G G C T G C T T                                       | 200  |
| <b>Mild Psoriatic KRT10</b> | 101  | T A A G A A T T T C T A G C A G C A A A G G C T C C C T T G G T G G A G G A T T T A G C T C A G G G G G T T C A G T G G T G G C T C T T T T A G C C G T G G G A G C T C T G G T G G G G G C T G C T T                                       | 200  |
| <b>KRT10</b>                | 201  | T G G G G G C T C A T C A G G T G G C T A T G G A G G A T T A G G A G G T T T T G G T G G A G G T A G C T T T C G T G G A A G C T A T G G A A G T A G C A G C T T T G G T G G G A G T T A T G G A G G C                                     | 300  |
| <b>Mild Psoriatic KRT10</b> | 201  | T G G G G G C T C A T C A G G T G G C T A T G G A G G A T T A G G A G G T T T T G G T G G A G G T A G C T T T C G T G G A A G C T A T G G A A G T A G C A G C T T T G G T G G G A G T T A T G G A G G C                                     | 300  |
| <b>KRT10</b>                | 301  | A G C T T T G G A G G G G G C A G T T T C G G A G G T G G C A G C T T T G G T G G G G G C A G C T T T G G T G G A G G C G G C T T T G G T G G A G G C G G C T T T G G A G G A G G C T T T G G T G G T G                                     | 400  |
| <b>Mild Psoriatic KRT10</b> | 301  | A G C T T T G G A G G G G G C A G T T T C G G A G G T G G C A G C T T T G G T G G G G G C A G C T T T G G T G G A G G C G G C T T T G G T G G A G G C G G C T T T G G A G G A G G C T T T G G T G G T G                                     | 400  |
| <b>KRT10</b>                | 401  | G A T T T G G A G G A G A T G G T G G C C T T C T C T C T G G A A A T G A A A A A G T A A C C A T G C A G A A T C T G A A T G A C C G C C T G G C T T C C T A C T T G G A C A A A G T T C G G G C T C T                                     | 500  |
| <b>Mild Psoriatic KRT10</b> | 401  | G A T T T G G A G G A G A A G G T G G C C T T C T C T T T G G A A A T G A A A A A G T A A C C A T G C A G A A T C T G A A T G A C C G C C T G G C T T C C T A C T T G G A C A A A G T T C G G G C T C T                                     | 500  |
| <b>KRT10</b>                | 501  | G G A A G A A T C A A A C T A T G A G C T G G A A G G C A A A A T C A A G G A G T G G T A T G A A A A G C A T G G C A A C T C A C A T C A G G G G G A G C C T C G T G A C T A C A G C A A A T A C T A C                                     | 600  |
| <b>Mild Psoriatic KRT10</b> | 501  | G C A A G A A T C A A A C T A T G A G C T G G A A G G C A A A A T C A A G G A G T G G T A T G A A A A G C A T G G C A A C T C A C A T C A G G G G G A G C C T C G T G A C T A C A G C A A A T A C T A C                                     | 600  |
| <b>KRT10</b>                | 601  | A A A A C C A T C G A T G A C C T T A A A A A T C A G A T T C T C A A C C T A A C A A C T G A T A A T G C C A A C A T C C T G C T T C A G A T C G A C A A T G C C A G G C T G G C A G C T G A T G A C T                                     | 700  |
| <b>Mild Psoriatic KRT10</b> | 601  | A A A A C C A T C G A T G A C C T T A A A A A T C A G A T T C T C A A C C T A A C A A C T G A T A A T G C C A A C A T C C T G C T T C A G A T C G A C A A T T C C A G G C T G G C A G C T G A T G A C T                                     | 700  |
| <b>KRT10</b>                | 701  | T C A G G C T G A A G T A T G A G A A T G A G G T A G C T C T G C G C C A G A G C G T G G A G G C T G A C A T C A A C G G C C T G C G T A G G G T G C T G G A T G A G C T G A C C C T G A C C A A G G C                                     | 800  |
| <b>Mild Psoriatic KRT10</b> | 701  | T C A G G C T G A A G T A T C A G A A T G A G G T A G C T G T G C G C C A G A G C G T G G A G G C T G A C A T C A A C G G C C T G C G T A T G G T G C T G G A T G A G C T G A C C C T G A C C A A G G C                                     | 800  |
| <b>KRT10</b>                | 801  | T G A C C T G G A G A T G C A A A T T G A G A G C C T G A C T G A A G A G C T G G C C T A T C T G A A G A A G A A C C A C G A G G A G G A A A T G A A A G A C C T T C G A A A T G T G T C C A C T G G T                                     | 900  |
| <b>Mild Psoriatic KRT10</b> | 801  | T G A C C T G G A G A T G C A A A T T G A G A G C C T G A C T G A A G A G C T G G C C T A T C T G A A G A A G A A C C A C G A G G A G G A A A T G A A A G A C C T T C G A A A T G T G T C C A C T G G T                                     | 900  |
| <b>KRT10</b>                | 901  | G A T G T G A A T G T G G A A A T G A A T G C T G C C C C G G G T G T T G A T C T G A C T C A A C T T C T G A A T A A C A T G A G A A G C C A A T A T G A A C A A C T T G C T G A A C A A A A C C G C A                                     | 1000 |
| <b>Mild Psoriatic KRT10</b> | 901  | G A T G T G A A T G T G G A A A T G A A T G C T G C C C C G G G T G T T G A T C T G A C T C A A C T T C T G A A T A A C A T G A G A A G C C A A T A T G A A C A A C T T G C T G A A C A A A A C C G C A                                     | 1000 |
| <b>KRT10</b>                | 1001 | A A G A T G C T G A A G C C T G G T T C A A T G A A A A G A G C A A G G A A C T G A C T A C A G A A A T T G A T A A T A A C A T T G A A C A G A T A T C C A G C T A T A A A T C T G A G A T T A C T G A                                     | 1100 |
| <b>Mild Psoriatic KRT10</b> | 1001 | A A G A T G C T G A A G C C T G G T T C A A T G A A A A G A G C A A G G A A C T G A C T A C A G A A A T T G A T A A T A A C A T T G A A C A G A T A T C C A G C T A T A A A T C T G A G A T T A C T G A                                     | 1100 |
| <b>KRT10</b>                | 1101 | A T T G A G A C G T A A T G T A C A A G C T C T G G A G A T A G A A C T A C A G T C C C A A C T G G C C T T G A A A C A A T C C C T G G A A G C C T C C T T G G C A G A A A C A G A A G G T C G C T A C                                     | 1200 |
| <b>Mild Psoriatic KRT10</b> | 1101 | A T T G A G A C G T A A T G T A C A A G C T C T G G A G A T A G A A C T A C A G T C C C A A C T G G C C T T G A A A C A A T C C C T G G A A G C C T C C T T G G C A G A A A C A G A A G G T C G C T A C                                     | 1200 |
| <b>KRT10</b>                | 1201 | T G T G T G C A G C T C T C A C A G A T T C A G G C C C A G A T A T C C G C T C T G G A A G A A C A G T T G C A A C A G A T T C G A G C T G A A A C C G A G T G C C A G A A T A C T G A A T A C C A A C                                     | 1300 |
| <b>Mild Psoriatic KRT10</b> | 1201 | T G T G T G C A G C T C T C A C A G A T T C A G G C C C A G A T A T C C G C T C T G G A A G A A C A G T T G C A A C A G A T T C G A G C T G A A A C C G A G T G C C A G A A T A C T G A A T A C C A A C                                     | 1300 |
| <b>KRT10</b>                | 1301 | A A C T C C T G G A T A T T A A G A T C C G A C T G G A G A A T G A A A T T C A A A C C T A C C G C A G C C T G C T A G A A G G A G A G G G A A G T T C C G G A G G C G G C G G A C G C G G C G G C G G                                     | 1400 |
| <b>Mild Psoriatic KRT10</b> | 1301 | A A C T C C T G G A T A T T A A G A T C C G A C T G G A G A A T G A A A T T C A A A C C T A C C G C A G C C T G C T A G A A G G A G A G G G A A G T T C C G G A G G C G G C G G A C G C G G C G G C G G                                     | 1400 |
| <b>KRT10</b>                | 1401 | A A G T T T C G G C G G C G G C T A C G G C G G C G G A A G C T C C G G C G G C G G A A G C T C C G G C G G C G G C C A C G G C G G C G G C C A C G G C G G C A G T T C C G G C G G C G G C T A C G G A                                     | 1500 |
| <b>Mild Psoriatic KRT10</b> | 1401 | A A G T T T C G G C G G C G G C T A C G G C G G C G G A A G C T C C G G C G G C G G A A G C T C C G G C G G C G G C C A C G G C G G C G G C C A C G G C G G C A G T T C C G G C G G C G G C T A C G G A                                     | 1500 |
| <b>KRT10</b>                | 1501 | G G C G G A A G C T C C G G C G G C G G A A G C T C C G G C G G C G G C T A C G G G G G C G G A A G C T C C A G C G G C G G C C A C G G C G G C A G T T C C A G C G G C G G C T A C G G T G G T G G C A                                     | 1600 |
| <b>Mild Psoriatic KRT10</b> | 1501 | G G C G G A A G C T C C G G C G G C G G A A G C T C C G G C G G C G G C T A C G G G G G C G G A A G C T C C A G C G G C G G C C A C G G C G G C A G T T C C A G C G G C G G C T A C G G T G G T G G C A                                     | 1600 |
| <b>KRT10</b>                | 1601 | G T T C C G G C G G C G G C G G C G G C T A C G G G G G C G G C A G C T C C G G C G G C G G C A G C A G C T C C G G C G G C G G A T A C G G C G G C G G C A G C T C C A G C G G A G G C C A C A A                                           | 1700 |
| <b>Mild Psoriatic KRT10</b> | 1601 | G T T C C G G C G G C G G C G G C G G C T A C G G G G G C G G C A G C T C C G G C G G C G G C A G C A G C T C C G G C G G C G G A T A C G G C G G C G G C A G C T C C A G C G G A G G C C A C A A                                           | 1700 |
| <b>KRT10</b>                | 1701 | G T C C T C C T C T T C C G G G T C C G T G G G C G A G T C T T C A T C T A A G G G A C C A A G A T A C T A A                                                                                                                               | 1755 |
| <b>Mild Psoriatic KRT10</b> | 1701 | G T C C T C C T C T T C C G G G T C C G T G G G C G A G T C T T C A T C T A A G G G A C C A A G A T A C T A A                                                                                                                               | 1755 |



**Figure S2:** Comparison of the identified epidermal and hyperproliferative type I keratin nucleotide sequence of moderate psoriasis obtained in this study with those of respective NCBI CDS sequences. The mutated sequences are indicated by arrow.

|                                 |      |                                                                                                                                                                                                         |      |
|---------------------------------|------|---------------------------------------------------------------------------------------------------------------------------------------------------------------------------------------------------------|------|
| <b>KRT14</b>                    | 1    | A T G A C C A C C T G C A G C C G C C A G T T C A C C T C C T C C A G C T C C A T G A A G G G C T C C T G C G G C A T C G G G G G C G G C A T C G G G G G C G G C T C C A G C C G C A T C T C C T C C G | 100  |
| <b>Moderate Psoriatic KRT14</b> | 1    | A T G A C C A C C T G C A G C C G C C A G T T C A C C T C C T C C A G C T C C A T G A A G G G C T C C T G C G G C A T C G G G G G C G G C A T C G G G G G C G G C T C C A G C C G C A T C T C C T C C G | 100  |
| <b>KRT14</b>                    | 101  | T C C T G G C C G G A G G G T C C T G C C G C G C C C C A G C A C C T A C G G G G G C G G C C T G T C T G T C T C A T C C T C C C G C T T C T C C T C T G G G G G A G C C T A C G G G C T G G G G G G   | 200  |
| <b>Moderate Psoriatic KRT14</b> | 101  | T C C T G G C C G G A G G G T C C T G C C G C G C C C C A G C A C C T A C G G G G G C G G C C T G T C T G T C T C A T C C T C C C G C T T C T C C T C T G G G G G A G C C T A C G G G C T G G G G G G   | 200  |
| <b>KRT14</b>                    | 201  | C G G C T A T G G C G G T G G C T T C A G C A G C A G C A G C A G C A G C T T T G G T A G T G G C T T T G G G G G A G G A T A T G G T G G T G G C C T T G G T G C T G G C T T G G G T G G T G G C T T T | 300  |
| <b>Moderate Psoriatic KRT14</b> | 201  | C G G C T A T G G C G G T G G C T T C A G C A G C A G C A G C A G C A G C T T T G G T A G T G G C T T T G G G G G A G G A T A T G G T G G T G G C C T T G G T G C T G G C T T G G G T G G T G G C T T T | 300  |
| <b>KRT14</b>                    | 301  | G G T G G T G G C T T T G C T G G T G G T G A T G G G C T T C T G G T G G G C A G T G A G A A G G T G A C C A T G C A G A A C C T C A A T G A C C G C C T G G C C T C C T A C C T G G A C A A G G T G C | 400  |
| <b>Moderate Psoriatic KRT14</b> | 301  | G G T G G T G G C T T T G C T G G T G G T G A T G G G C T T C T G G T G G G C A G T G A G A A G G T G A C C A T G C A G A A C C T C A A T G A A C G C C T G G C C T C C T A C G T G G A C A A G G T G C | 400  |
| <b>KRT14</b>                    | 401  | G T G C T C T G G A G G A G G C C A A C G C C G A C C T G G A A G T G A A G A T C C G T G A C T G G T A C C A G A G G C A G C G G C C T G C T G A G A T C A A A G A C T A C A G T C C C T A C T T C A A | 500  |
| <b>Moderate Psoriatic KRT14</b> | 401  | G T G C T C T G G A G G A C C C C A T C G C C G A C C T G G A A G T G A A G A T C T G T G A C T G G T A C C A G A G G C A G C G G C T T G C T G A G A T C A T A G A C T A C A G T C C C T A C T T C A A | 500  |
| <b>KRT14</b>                    | 501  | G A C C A T T G A G G A C C T G A G G A A C A A G A T T C T C A C A G C C A C A G T G G A C A A T G C C A A T G T C C T T C T G C A G A T T G A C A A T G C C C G T C T G G C C G C G G A T G A C T T C | 600  |
| <b>Moderate Psoriatic KRT14</b> | 501  | G A C C A T T G A G G T C C T G A G T A A C A A G A T T C T C A C A G C C A C A G T G G A C A A T G C C A A T G T C C T T C T G C A G A T T G A C A A T G C C C G T C T G G C C G C G G A T G A C T T C | 600  |
| <b>KRT14</b>                    | 601  | C G C A C C A A G T A T G A G A C A G A G T T G A A C C T G C G C A T G A G T G T G G A A G C C G A C A T C A A T G G C C T G C G C A G G G T G C T G G A C G A A C T G A C C C T G G C C A G A G C T G | 700  |
| <b>Moderate Psoriatic KRT14</b> | 601  | C G C A C C A A G T A T G A G A C A G A G T T G A A C C T G C G C A T G A G T G T G G A A G C C G A C A T C A A T G T C C T G C G C A G G G T G C T G G A C G A A C T G A C C C T G G C C A G A G C T G | 700  |
| <b>KRT14</b>                    | 701  | A C C T G G A G A T G C A G A T T G A G A G C C T G A A G G A G G A G C T G G C C T A C C T G A A G A A G A A C C A C G A G G A G G A G A T G A A T G C C C T G A G A G G C C A G G T G G G T G G A G A | 800  |
| <b>Moderate Psoriatic KRT14</b> | 701  | A C C T G G A G A T G C A G A T T G A G A G C C T G A A G G A G G A G C T G G C C T A C C T G A A G A A G A A C C A C G A G G A G G A G A T G A A T G C C C T G A G A G G C C A G G T G G G T G G A G A | 800  |
| <b>KRT14</b>                    | 801  | T G T C A A T G T G G A G A T G G A C G C T G C A C C T G G C G T G G A C C T G A G C C G C A T T C T G A A C G A G A T G C G T G A C C A G T A T G A G A A G A T G G C A G A G A A G A A C C C C A A G | 900  |
| <b>Moderate Psoriatic KRT14</b> | 801  | T G T C A A T G T G G A G A T G G A C G C T G C A C C T G G C G T G G A C C T G A G C C G C A T T C T G A A C G A G A T G C G T G A C C A G T A T G A G A A G A T G G C A G A G A A G A A C C C C A A G | 900  |
| <b>KRT14</b>                    | 901  | G A T G C C G A G G A A T G G T T C T T C A C C A A G A C A G A G G A G C T G A A C C G C G A G G T G G C C A C C A A C A G C G A G C T G G T G C A G A G C G G C A A G A G C G A G A T C T C G G A G C | 1000 |
| <b>Moderate Psoriatic KRT14</b> | 901  | G A T C C C G A G G A A T G G T T C T T C A C C A A G A C A G A G G A G C T G A A C C C C G A G G T G G C C A C C A A C A G C G A G C T G G T G C A G A G C G G C A A G A G C G A G A T C T C G G A G C | 1000 |
| <b>KRT14</b>                    | 1001 | T C C G G C G C A C C A T G C A G A A C C T G G A G A T T G A G C T G C A G T C C C A G C T C A G C A T G A A A G C A T C C C T G G A G A A C A G C C T G G A G G A G A C C A A A G G T C G C T A C T G | 1100 |
| <b>Moderate Psoriatic KRT14</b> | 1001 | T C C G G C G C A C C A T G C A G A A C C T G G A G A T T G A G C T G C A G T C C C A G C T C A G C A T G A A A C C A T C C C T G G A G A A C A G C C T G G A G G A G A C C A A A G G T C G C T A C T G | 1100 |
| <b>KRT14</b>                    | 1101 | C A T G C A G C T G G C C C A G A T C C A G G A G A T G A T T G G C A G C G T G G A G G A G C A G C T G G C C C A G C T C C G C T G C G A G A T G G A G C A G C A G A A C C A G G A G T A C A A G A T C | 1200 |
| <b>Moderate Psoriatic KRT14</b> | 1101 | C A T G C A G C T G G C C C A G A T C C A G G A G A T G A T T G G C A G C G T G G A G G A G C A G C T G G C C C A G C T C C G C T G C G A G A T G G A G C A G C A G A A C C A G G A G T A C A A G A T C | 1200 |
| <b>KRT14</b>                    | 1201 | C T G C T G G A C G T G A A G A C G C G G C T G G A G C A G G A G A T C G C C A C C T A C C G C C G C C T G C T G G A G G G C G A G G A C G C C C A C C T C T C C T C C T C C C A G T T C T C C T C T G | 1300 |
| <b>Moderate Psoriatic KRT14</b> | 1201 | C T G C T G G A C G T G A A G A C G C G G C T G G A G C A G G A G T T C A C C A C C T A C T G C C G C C T G C T G G A G G G C G A G G A C G C C C A C C T C T C C T C C T C C C A G T T C T C C T C T G | 1300 |
| <b>KRT14</b>                    | 1301 | G A T C G C A G T C A T C C A G A G A T G T G A C C T C C T C C A G C C G C C A A A T C C G C A C C A A G G T C A T G G A T G T G C A C G A T G G C A A G G T G G T G T C C A C C C A C G A G C A G G T | 1400 |
| <b>Moderate Psoriatic KRT14</b> | 1301 | G A T C G C A G T C A T C C A G A G A T G T G A C C T C C T C C A G C C G C C A A A T C C G C A C C A A G G T C A T G G A T G T G C A C G A T G G C A A G G T G G T G T C C A C C C A C G A G C A G G T | 1400 |
| <b>KRT14</b>                    | 1401 | C C T T C G C A C C A A G A A C T G A                                                                                                                                                                   | 1419 |
| <b>Moderate Psoriatic KRT14</b> | 1401 | C C T T C G C A C C A A G A A C T G A                                                                                                                                                                   | 1419 |



**Figure S2:** Comparison of the identified epidermal and hyperproliferative type I keratin nucleotide sequence of moderate psoriasis obtained in this study with those of respective NCBI CDS sequences. The mutated sequences are indicated by arrow.

|                                 |      |                                                                                                                                                                                                         |      |
|---------------------------------|------|---------------------------------------------------------------------------------------------------------------------------------------------------------------------------------------------------------|------|
| <b>KRT10</b>                    | 1    | A T G T C T G T T C G A T A C A G C T C A A G C A A G C A C T A C T C T T C C T C C C G C A G T G G A G G A G G A G G A G G A G G A G G A T G T G G A G G A G G A G G A G G A G T G T C A T C C C       | 100  |
| <b>Moderate Psoriatic KRT10</b> | 1    | A T G T C T G T T C G A T A C A G C T C A A G C A A G C A C T A C T C T T C C T C C C G C A G T G G A G G A G G A G G A G G A G G A G G A T G T G G A G G A G G A G G A G G A G T G T C A T C C C       | 100  |
| <b>KRT10</b>                    | 101  | T A A G A A T T T C T A G C A G C A A A G G C T C C C T T G G T G G A G G A T T T A G C T C A G G G G G T T C A G T G G T G G C T C T T T T A G C C G T G G G A G C T C T G G T G G G G G C T G C T T   | 200  |
| <b>Moderate Psoriatic KRT10</b> | 101  | T A A G A A T T T C T A G C A G C A A A G G C T C C C T T G G T G G A G G A T T T A G C T C A G G G G G T T C A G T G G T G G C T C T T T T A G C C G T G G G A G C T C T G G T G G G G G C T G C T T   | 200  |
| <b>KRT10</b>                    | 201  | T G G G G G C T C A T C A G G T G G C T A T G G A G G A T T A G G A G G T T T T G G T G G A G G T A G C T T T C G T G G A A G C T A T G G A A G T A G C A G C T T T G G T G G G A G T T A T G G A G G C | 300  |
| <b>Moderate Psoriatic KRT10</b> | 201  | T G G G G G C T C A T C A G G T G G C T A T G G A G G A T T A G G A G G T T T T G G T G G A G G T A G C T T T C G T G G A A G C T A T G G A A G T A G C A G C T T T G G T G G G A G T T A T G G A G G C | 300  |
| <b>KRT10</b>                    | 301  | A G C T T T G G A G G G G G C A G T T T C G G A G G T G G C A G C T T T G G T G G G G G C A G C T T T G G T G G A G G C G G C T T T G G T G G A G G C G G C T T T G G A G G A G G C T T T G G T G G T G | 400  |
| <b>Moderate Psoriatic KRT10</b> | 301  | A G C T T T G G A G G G G G C A G T T T C G G A G G T G G C A G C T T T G G T G G G G G C A G C T T T G G T G G A G G C G G C T T T G G T G G A G G C G G C T T T G G A G G A G G C T T T G G T G G T G | 400  |
| <b>KRT10</b>                    | 401  | G A T T T G G A G G A G A T G G T G G C C T T C T C T C T G G A A A T G A A A A A G T A A C C A T G C A G A A T C T G A A T G A C C G C C T G G C T T C C T A C T T G G A C A A A G T T C G G G C T C T | 500  |
| <b>Moderate Psoriatic KRT10</b> | 401  | G A T T T G G A G G A G A A G G T G G C C T T C T C T T T G G A A A T G A A A A A G T A A C C A T G C A G A A T C T G A A T G A C C G C C T G G C T T C C T C C T T G G A C A A A G T T C G G G C T C T | 500  |
| <b>KRT10</b>                    | 501  | G G A A G A A T C A A A C T A T G A G C T G G A A G G C A A A A T C A A G G A G T G G T A T G A A A A G C A T G G C A A C T C A C A T C A G G G G G A G C C T C G T G A C T A C A G C A A A T A C T A C | 600  |
| <b>Moderate Psoriatic KRT10</b> | 501  | G C A A G A A T C A A A C T A T G A G A T G G A A G G C A A A A T C A A G G A G T G G T A T G A A A A G C A T G G C A A C T C A C A T C A G G G G G A G C C T C G T G A C T A C A G C A A A T A C T A C | 600  |
| <b>KRT10</b>                    | 601  | A A A A C C A T C G A T G A C C T T A A A A A T C A G A T T C T C A A C C T A A C A A C T G A T A A T G C C A A C A T C C T G C T T C A G A T C G A C A A T G C C A G G C T G G C A G C T G A T G A C T | 700  |
| <b>Moderate Psoriatic KRT10</b> | 601  | A A A A C C A T C G A T G A C C T T A A A A A T C A G A T T C T C A A C C T A A C A A C T G A T A A T G C C A A C A T C C T G C T T C A G A T C G C C A A T T C C A G G C T G G C A G C T G A T G A C T | 700  |
| <b>KRT10</b>                    | 701  | T C A G G C T G A A G T A T G A G A A T G A G G T A G C T C T G C G C C A G A G C G T G G A G G C T G A C A T C A A C G G C C T G C G T A T G G T G C T G G A T G A G C T G A C C C T G A C C A A G G C | 800  |
| <b>Moderate Psoriatic KRT10</b> | 701  | T C A T G C T G A A T T A T C A G A A T G A G G T A G C T G T G C G C C A G A G C G T G G A G G C T G A C A T C A A C G G C C T G C G T A T G G T G C T G G A T G A G C A G A C C C T G A C C A A G G C | 800  |
| <b>KRT10</b>                    | 801  | T G A C C T G G A G A T G C A A A T T G A G A G C C T G A C T G A A G A G C T G G C C T A T C T G A A G A A G A A C C A C G A G G A G G A A A T G A A A G A C C T T C G A A A T G T G T C C A C T G G T | 900  |
| <b>Moderate Psoriatic KRT10</b> | 801  | T G A C C T G G A G A T G C A A A T T G A G A G C C T G A C T G A A G A G C T G G C C T A T C T G A A G A A G A A C C A C G A G G A G G A A A T G A A A G A C C T T C G A A A T G T G T C C A C T G G T | 900  |
| <b>KRT10</b>                    | 901  | G A T G T G A A T G T G G A A A T G A A T G C T G C C C C G G G T G T T G A T C T G A C T C A A C T T C T G A A T A A C A T G A G A A G C C A A T A T G A A C A A C T T G C T G A A C A A A A C C G C A | 1000 |
| <b>Moderate Psoriatic KRT10</b> | 901  | G A T G T G A A T G T G G A A A T G A A T G C T G C C C C G G G T G T T G A T C T G A C T C A A C T T C T G A A T A A C A T G A G A A G C C A A T A T G A A C A A C T T G C T G A A C A A A A C C G C A | 1000 |
| <b>KRT10</b>                    | 1001 | A A G A T G C T G A A G C C T G G T T C A A T G A A A A G A G C A A G G A A C T G A C T A C A G A A A T T G A T A A T A A C A T T G A A C A G A T A T C C A G C T A T A A A T C T G A G A T T A C T G A | 1100 |
| <b>Moderate Psoriatic KRT10</b> | 1001 | A A G A T G C T G A A G C C T G G T T C A A T G A A A A G A G C A A G G A A C T G A C T A C A G A A A T T G A T A A T A A C A T T G A A C A G A T A T C C A G C T A T A A A T C T G A G A T T A C T G A | 1100 |
| <b>KRT10</b>                    | 1101 | A T T G A G A C G T A A T G T A C A A G C T C T G G A G A T A G A A C T A C A G T C C C A A C T G G C C T T G A A A C A A T C C C T G G A A G C C T C C T T G G C A G A A A C A G A A G G T C G C T A C | 1200 |
| <b>Moderate Psoriatic KRT10</b> | 1101 | A T T G A G A C G T A A T G T A C A A G C T C T G G A G A T A G A A C T A C A G T C C C A A C T G G C C T T G A A A C A A T C C C T G G A A G C C T C C T T G G C A G A A A C A G A A G G T C G C T A C | 1200 |
| <b>KRT10</b>                    | 1201 | T G T G T G C A G C T C T C A C A G A T T C A G G C C C A G A T A T C C G C T C T G G A A G A A C A G T T G C A A C A G A T T C G A G C T G A A A C C G A G T G C C A G A A T A C T G A A T A C C A A C | 1300 |
| <b>Moderate Psoriatic KRT10</b> | 1201 | T G T G T G C A G C T C T C A C A G A T T C A G G C C C A G A T A T C C G C T C T G G A A G A A C A G T T G C A A C A G A T T C G A G C T G A A A C C G A G T G C C A G A A T A C T G A A T A C C A A C | 1300 |
| <b>KRT10</b>                    | 1301 | A A C T C C T G G A T A T T A A G A T C C G A C T G G A G A A T G A A A T T C A A A C C T A C C G C A G C C T G C T A G A A G G A G A G G G A A G T T C C G G A G G C G G C G G A C G C G G C G G C G G | 1400 |
| <b>Moderate Psoriatic KRT10</b> | 1301 | A A C T C C T G G A T A T T A A G A T C C G A C T G G A G A A T G A A A T T C A A A C C T A C C G C A G C C T G C T A G A A G G A G A G G G A A G T T C C G G A G G C G G C G G A C G C G G C G G C G G | 1400 |
| <b>KRT10</b>                    | 1401 | A A G T T T C G G C G G C G G C T A C G G C G G C G G A A G C T C C G G C G G C G G A A G C T C C G G C G G C G G C C A C G G C G G C G G C C A C G G C G G C A G T T C C G G C G G C G G C T A C G G A | 1500 |
| <b>Moderate Psoriatic KRT10</b> | 1401 | A A G T T T C G G C G G C G G C T A C G G C G G C G G A A G C T C C G G C G G C G G A A G C T C C G G C G G C G G C C A C G G C G G C G G C C A C G G C G G C A G T T C C G G C G G C G G C T A C G G A | 1500 |
| <b>KRT10</b>                    | 1501 | G G C G G A A G C T C C G G C G G C G G A A G C T C C G G C G G C G G C T A C G G G G G C G G A A G C T C C A G C G G C G G C C A C G G C G G C A G T T C C A G C G G C G G C T A C G G T G G T G G C A | 1600 |
| <b>Moderate Psoriatic KRT10</b> | 1501 | G G C G G A A G C T C C G G C G G C G G A A G C T C C G G C G G C G G C T A C G G G G G C G G A A G C T C C A G C G G C G G C C A C G G C G G C A G T T C C A G C G G C G G C T A C G G T G G T G G C A | 1600 |
| <b>KRT10</b>                    | 1601 | G T T C C G G C G G C G G C G G C G G C T A C G G G G G C G G C A G C T C C G G C G G C G G C A G C A G C T C C G G C G G C G G A T A C G G C G G C G G C A G C T C C A G C G G A G G C C A C A A       | 1700 |
| <b>Moderate Psoriatic KRT10</b> | 1601 | G T T C C G G C G G C G G C G G C G G C T A C G G G G G C G G C A G C T C C G G C G G C G G C A G C A G C T C C G G C G G C G G A T A C G G C G G C G G C A G C T C C A G C G G A G G C C A C A A       | 1700 |
| <b>KRT10</b>                    | 1701 | G T C C T C C T C T T C C G G G T C C G T G G G C G A G T C T T C A T C T A A G G G A C C A A G A T A C T A A                                                                                           | 1755 |
| <b>Moderate Psoriatic KRT10</b> | 1701 | G T C C T C C T C T T C C G G G T C C G T G G G C G A G T C T T C A T C T A A G G G A C C A A G A T A C T A A                                                                                           | 1755 |



**Figure S2:** Comparison of the identified epidermal and hyperproliferative type I keratin nucleotide sequence of moderate psoriasis obtained in this study with those of respective NCBI CDS sequences. The mutated sequences are indicated by arrow.

|                                 |      |                                                                                                                                                                                                         |      |
|---------------------------------|------|---------------------------------------------------------------------------------------------------------------------------------------------------------------------------------------------------------|------|
| <b>KRT16</b>                    | 1    | A T G A C C A C C T G C A G C C G C C A G T T C A C C T C C T C C A G C T C C A T G A A G G G C T C C T G C G G C A T C G G A G G C G G C A T C G G G G G C G G C T C C A G C C G C A T C T C C T C C G | 100  |
| <b>Moderate Psoriatic KRT16</b> | 1    | A T G A C C A C C T G C A G C C G C C A G T T C A C C T C C T C C A G C T C C A T G A A G G G C T C C T G C G G C A T C G G A G G C G G C A T C G G G G G C G G C T C C A G C C G C A T C T C C T C C G | 100  |
| <b>KRT16</b>                    | 101  | T C C T G G C C G G A G G G T C C T G C C G T G C C C C A G C A C C T A C G G G G G C G G C C T G T C T G T C T C C T C T C G C T T C T C C T C T G G G G G A G C C T G C G G G C T G G G G G G C G G   | 200  |
| <b>Moderate Psoriatic KRT16</b> | 101  | T C C T G G C C G G A G G G T C C T G C C G T G C C C C A G C A C C T A C G G G G G C G G C C T G T C T G T C T C C T C T C G C T T C T C C T C T G G G G G A G C C T G C G G G C T G G G G G G C G G   | 200  |
| <b>KRT16</b>                    | 201  | C T A T G G C G G T G G C T T C A G C A G C A G C A G C A G C T T T G G T A G T G G C T T C G G G G G A G G A T A T G G T G G T G G C C T T G G T G C T G G C T T C G G T G G T G G C T T G G G T G C T | 300  |
| <b>Moderate Psoriatic KRT16</b> | 201  | C T A T G G C G G T G G C T T C A G C A G C A G C A G C A G C T T T G G T A G T G G C T T C G G G G G A G G A T A T G G T G G T G G C C T T G G T G C T G G C T T C G G T G G T G G C T T G G G T G C T | 300  |
| <b>KRT16</b>                    | 301  | G G C T T T G G T G G T G G T T T T G C T G G T G G T G A T G G G C T T C T G G T G G G C A G T G A G A A G G T G A C C A T G C A G A A C C T C A A T G A C C G C C T G G C C T C C T A C C T G G A C A | 400  |
| <b>Moderate Psoriatic KRT16</b> | 301  | G G C T T T G G T G G T G G T T T T G C T G G T G G T G A T G G G C T T C T G G T G G G C A G T G A G A A G G T G A C C A T G C A G A A C C T C A A T G A C C G C C T G G C C T C C T A C C T G G A C A | 400  |
| <b>KRT16</b>                    | 401  | A G G T G C G T G C T C T G G A G G A G G C C A A C G C C G A C C T G G A A G T G A A G A T C C G T G A C T G G T A C C A G A G G C A G C G G C C C A G T G A G A T C A A A G A C T A C A G T C C C T A | 500  |
| <b>Moderate Psoriatic KRT16</b> | 401  | A G G T G C G T G T T C T G G A G G A G G C C A A C G C C G A C C T G G A A G T G A A G A T C C G T G A C T G G T A C C A G A G G C A G C G G C C C A G T G A G A T C A A A G A C T A C A G T C C C T A | 500  |
| <b>KRT16</b>                    | 501  | C T T C A A G A C C A T C G A G G A C C T G A G G A A C A A G A T C A T T G C G G C C A C C A T T G A G A A T G C G C A G C C C A T T T T G C A G A T T G A C A A T G C C A G G C T G G C A G C C G A T | 600  |
| <b>Moderate Psoriatic KRT16</b> | 501  | C T T C A A G A C C A T C G A G G A C C T G A G G A A C A A G A T C A T T G C G G C C A C C A T T G A G A A T G C G C A G C C C A T T T T G C A G A T T G A C A A T T C C A G G A T G G C A G C C G A T | 600  |
| <b>KRT16</b>                    | 601  | G A C T T C A G G A C C A A G T A T G A G C A T G A A C T G G C C C T G C G G C A G A C T G T G G A G G C C G A C G T C A A T G G C C T G C G C C G G G T G T T G G A T G A G C T G A C C C T G G C C A | 700  |
| <b>Moderate Psoriatic KRT16</b> | 601  | G A C T T C A G G A C C A A G T A T G A G C A T G A A C T G G C C C T G C G G C A G A C T G T G G A G G C C G A C G T C A A T G G C C T G C G C C G G G T G T T G G A T G A G C T G A C C C T G G C C A | 700  |
| <b>KRT16</b>                    | 701  | G G A C T G A C C T G G A G A T G C A G A T C G A A G G C C T G A A G G A G G A G C T G G C C T A C C T G A G G A A G A A C C A C G A G G A G G A G A T G C T T G C T C T G A G A G G T C A G A C C G G | 800  |
| <b>Moderate Psoriatic KRT16</b> | 701  | G G A C T G A C C T G G A G A T G C A G A T C G A A G G C C T G A A G G A G G A G C T G G C C T A C C T G A G G A A G A A C C A C G A G G A G G A G A T G C T T G C T C T G A G A G G T C A G A C C G G | 800  |
| <b>KRT16</b>                    | 801  | C G G A G A T G T G A A C G T G G A G A T G G A T G C T G C A C C T G G C G T G G A C C T G A G C C G C A T C C T G A A T G A G A T G C G T G A C C A G T A C G A G C A G A T G G C A G A G A A A A C   | 900  |
| <b>Moderate Psoriatic KRT16</b> | 801  | C G G A G A T G T G A A C G T G G A G A T G G A T G C T G C A C C T G G C G T G G A C C T G A G C C G C A T C C T G A A T G A G A T G C G T G A C C A G T A C G A G C A G A T G G C A G A G A A A A C   | 900  |
| <b>KRT16</b>                    | 901  | C G C A G A G A C G C T G A G A C C T G G T T C C T G A G C A A G A C C G A G G A G C T G A A C A A A G A A G T G G C C T C C A A C A G C G A A C T G G T A C A G A G C A G C C G C A G T G A G G T G A | 1000 |
| <b>Moderate Psoriatic KRT16</b> | 901  | C G C A G A G A C G C T G A G A C C T G G T T C C T G A G C A A G A C C G A G G A G C T G A A C A A A G A A G T G G C C T C C A A C A G C G A A C T G G T A C A G A G C A G C C G C A G T G A G G T G A | 1000 |
| <b>KRT16</b>                    | 1001 | C G G A G C T C C G G A G G G T G C T C C A G G G C C T G G A G A T T G A G C T G C A G T C C C A G C T C A G C A T G A A A G C A T C C C T G G A G A A C A G C C T G G A G G A G A C C A A A G G C C G | 1100 |
| <b>Moderate Psoriatic KRT16</b> | 1001 | C G G A G C T C C G G A G G G T G C T C C A G G G C C T G G A G A T T G A G C T G C A G T C C C A G C T C A G C A T G A A A G C A T C C C T G G A G A A C A G C C T G G A G G A G A C C A A A G G C C G | 1100 |
| <b>KRT16</b>                    | 1101 | C T A C T G C A T G C A G C T G T C C C A G A T C C A G G G A C T G A T T G G C A G T G T G G A G G A G C A G C T G G C C C A G C T A C G C T G T G A G A T G G A G C A G C A G A G C C A G G A G T A C | 1200 |
| <b>Moderate Psoriatic KRT16</b> | 1101 | C T A C T G C A T G C A G C T G T C C C A G A T C C A G G G A C T G A T T G G C A G T G T G G A G G A G C A G C T G G C C C A G C T A C G C T G T G A G A T G G A G C A G C A G A G C C A G G A G T A C | 1200 |
| <b>KRT16</b>                    | 1201 | C A G A T C T T G C T G G A T G T G A A G A C G C G G C T G G A G C A G G A G A T T G C C A C C T A C C G C C G C C T G C T G G A G G G C G A G G A T G C C C A C C T T T C C T C C C A G C A A G C A T | 1300 |
| <b>Moderate Psoriatic KRT16</b> | 1201 | C A G A T C T T G C T G G A T G T G A A G A C G C G G C T G G A G C A G G A G A T T G C C A C C T A C C G C C G C C T G C T G G A G G G C G A G G A T G C C C A C C T T T C C T C C C A G C A A G C A T | 1300 |
| <b>KRT16</b>                    | 1301 | C T G G C C A A T C C T A T T C T T C C C G C G A G G T C T T C A C C T C C T C C T C G T C C T C T T C G A G C C G T C A G A C C C G G C C C A T C C T C A A G G A G C A G A G C T C A T C C A G C T T | 1400 |
| <b>Moderate Psoriatic KRT16</b> | 1301 | C T G G C C A A T C C T A T T C T T C C C G C G A G G T C T T C A C C T C C T C C T C G T C C T C T T C G A G C C G T C A G A C C C G G C C C A T C C T C A A G G A G C A G A G C T C A T C C A G C T T | 1400 |
| <b>KRT16</b>                    | 1401 | C A G C C A G G G C C A G A G C T C C T A G                                                                                                                                                             | 1422 |
| <b>Moderate Psoriatic KRT16</b> | 1401 | C A G C C A G G G C C A G A G C T C C T A G                                                                                                                                                             | 1422 |



**Figure S2:** Comparison of the identified epidermal and hyperproliferative type I keratin nucleotide sequence of moderate psoriasis obtained in this study with those of respective NCBI CDS sequences. The mutated sequences are indicated by arrow.

|                                 |      |                                                                                                                                                                                                         |      |
|---------------------------------|------|---------------------------------------------------------------------------------------------------------------------------------------------------------------------------------------------------------|------|
| <b>KRT 17</b>                   | 1    | A T G A C C A C C T C C A T C C G C C A G T T C A C C T C C T C C A G C T C C A T C A A G G G C T C C T C C G G C C T G G G G G G C G G C T C G T C C C G C A C C T C C T G C C G G C T G T C T G G C G | 100  |
| <b>Moderate Psoriatic KRT17</b> | 1    | A T G A C C A C C T C C A T C C G C C A G T T C A C C T C C T C C A G C T C C A T C A A G G G C T C C T C C G G C C T G G G G G G C G G C T C G T C C C G C A C C T C C T G C C G G C T G T C T G G C G | 100  |
| <b>KRT 17</b>                   | 101  | G C C T G G G T G C C G G C T C C T G C A G G C T G G G A T C T G C T G G C G G C C T G G G C A G C A C C C T C G G G G G T A G C A G C T A C T C C A G C T G C T A C A G C T T T G G C T C T G G T G G | 200  |
| <b>Moderate Psoriatic KRT17</b> | 101  | G C C T G G G T G C C G G C T C C T G C A G G C T G G G A T C T G C T G G C G G C C T G G G C A G C A C C C T C G G G G G T A G C A G C T A C T C C A G C T G C T A C A G C T T T G G C T C T G G T G G | 200  |
| <b>KRT 17</b>                   | 201  | T G G C T A T G G C A G C A G C T T T G G G G G T G T T G A T G G G C T G C T G G C T G G A G G T G A G A A G G C C A C C A T G C A G A A C C T C A A T G A C C G C C T G G C C T C C T A C C T G G A C | 300  |
| <b>Moderate Psoriatic KRT17</b> | 201  | T G G C T A T G G C A G C A G C T T T G G G G G T G T T G A T G G G C T G C T G G C T G G A G G T G A G A A G G C C A C C A T G C A G A A C C T C A A T G A C C G C C T G G C C T C C T A C C T G G A C | 300  |
| <b>KRT 17</b>                   | 301  | A A G G T G C G T G C C C T G G A G G A G G C C A A C A C T G A G C T G G A G G T G A A G A T C C G T G A C T G G T A C C A G A G G C A G G C C C C G G G G C C C G C C C G T G A C T A C A G C C A G T | 400  |
| <b>Moderate Psoriatic KRT17</b> | 301  | A A G G T G C G T G C C C T G G A G G A G G C C A A C A C T G A G C T G G A G G T G A A G A T C C G T G A C T G G T A C C A G A G G C A G G C C C C G G G G C C C G C C C G T G A C T A C A G C C A G T | 400  |
| <b>KRT 17</b>                   | 401  | A C T A C A G G A C A A T T G A G G A G C T G C A G A A C A A G A T C C T C A C A G C C A C C G T G G A C A A T G C C A A C A T C C T G C T A C A G A T T G A C A A T G C C C G T C T G G C T G C T G A | 500  |
| <b>Moderate Psoriatic KRT17</b> | 401  | A C T A C A G G A C A A T T G A G G A G C T G C A G A A C A A G A T C C T C A C A G C C A C C G T G G A C A A T G C C A A C A T C C T G C T A C A G A T T G A C A A T G C C C G T C T G G C T G C T G A | 500  |
| <b>KRT 17</b>                   | 501  | T G A C T T C C G C A C C A A G T T T G A G A C A G A G C A G G C C C T G C G C C T G A G T G T G G A G G C C G A C A T C A A T G G C C T G C G C A G G G T G C T G G A T G A G C T G A C C C T G G C C | 600  |
| <b>Moderate Psoriatic KRT17</b> | 501  | T G T C T T C C G C A C C A A G T T T G A G A C A G A G C A G G C C C T G C G C C T G A G T G T G G A G G C C G A C A T C A A T G G C C T G C G C A G G G T G C T G G A T G A G C T G A C C C T G G C C | 600  |
| <b>KRT 17</b>                   | 601  | A G A G C C G A C C T G G A G A T G C A G A T T G A G A A C C T C A A G G A G G A G C T G G C C T A C C T G A A G A A G A A C C A C G A G G A G G A G A T G A A C G C C C T G C G A G G C C A G G T G G | 700  |
| <b>Moderate Psoriatic KRT17</b> | 601  | A G A G C C G A C C T G G A G A T G C A G A T T G A G A A C C T C A A G G A G G A G C T G G C C T A C C T G A A G A A G A T C C A C G A G G A G G A G A T G A A C C C C C T G C G A G G C C A G G T G G | 700  |
| <b>KRT 17</b>                   | 701  | G T G G T G A G A T C A A T G T G G A G A T G G A C G C T G C C C C A G G C G T G G A C C T G A G C C G C A T C C T C A A C G A G A T G C G T G A C C A G T A T G A G A A G A T G G C A G A G A A G A A | 800  |
| <b>Moderate Psoriatic KRT17</b> | 701  | G T G G T G A G A T C A A T G T G G A G A T G G A C G C T G C C C C A G G C G T G G A C C T G A G C C G C A T C C T C A A C G A G A T G C G T G A C C A G T A T G A G A A G A T G G C A G A G A A G A A | 800  |
| <b>KRT 17</b>                   | 801  | C C G C A A G G A T G C C G A G G A T T G G T T C T T C A G C A A G A C A G A G G A A C T G A A C C G C G A G G T G G C C A C C A A C A G T G A G C T G G T G C A G A G T G G C A A G A G T G A G A T C | 900  |
| <b>Moderate Psoriatic KRT17</b> | 801  | C C G C A A G G A T G C C G A G G A T T G G T T C T T C A G C A A G A C A G A G G A A C T G A A C C G C G A G G T G G C C A C C A A C A G T G A G C T G G T G C A G A G T G G C A A G A G T G A G A T C | 900  |
| <b>KRT 17</b>                   | 901  | T C G G A G C T C C G G C G C A C C A T G C A G G C C T T G G A G A T A G A G C T G C A G T C C C A G C T C A G C A T G A A A G C A T C C C T G G A G G G C A A C C T G G C G G A G A C A G A G A A C C | 1000 |
| <b>Moderate Psoriatic KRT17</b> | 901  | T C G G A G T T C C G G C G C A C C A T G C A G G C C T T G G A G A T A G A G C T G C A G T C C C A G C T C A G C A T G A A A G C A T C C C T G G A G G G C A A C C T G G T G G A G A C A G A G A A C C | 1000 |
| <b>KRT 17</b>                   | 1001 | G C T A C T G C G T G C A G C T G T C C C A G A T C C A G G G G C T G A T T G G C A G C G T G G A G G A G C A G C T G G C C C A G C T T C G C T G C G A G A T G G A G C A G C A G A A C C A G G A A T A | 1100 |
| <b>Moderate Psoriatic KRT17</b> | 1001 | G C T A C T G C G T G C A G C T G T C C C A G A T C C A G G G G C T G A T T G G C A G C G T G G A G G A G C A G C T G G C C C A G C T T C T C T G C G A G A T G G A G C A G C A G A A C C A G G A A T A | 1100 |
| <b>KRT 17</b>                   | 1101 | C A A A A T C C T G C T G G A T G T G A A G A C G C G G C T G G A G C A G G A G A T T G C C A C C T A C C G C C G C C T G C T G G A G G G A G A G G A T G C C C A C C T G A C T C A G T A C A A G A A A | 1200 |
| <b>Moderate Psoriatic KRT17</b> | 1101 | C A A A A T C C T G C T G G A T G T G A A G A C G C G G C T G G A G C A G G A G A T T T C C A C C T A C C G C C G C C T G C T G G A G G G A G A G G A T G C C C A C C T G A C T C A G T A C A A G A A A | 1200 |
| <b>KRT 17</b>                   | 1201 | G A A C C G G T G A C C A C C C G T C A G G T G C G T A C C A T T G T G G A A G A G G T C C A G G A T G G C A A G G T C A T C T C C T C C C G C G A G C A G G T C C A C C A G A C C A C C C G C T G A   | 1299 |
| <b>Moderate Psoriatic KRT17</b> | 1201 | G A A C C G G T G C C C A C C C G T C A G G T G C G T A C C A T T G T G G A A G A G G T C C A G G A T G G C A A G G T C A T C T C C T C C C G C G A G C A G G T C C A C C A G A C C A C C C G C T G A   | 1299 |
